# Supplementary material for: Solid-State [2+2] Photoreaction of Isostructural Cd(II) Metal Complexes and Solid-State Fluorescence
Source: MDPI journal article supplement (doi:10.3390/molecules29020351), 2024-01-10
Supplement: s1 [file s1]

# Solid-State [2+2] Photoreaction of Isostructural Cd(II) Metal Complexes and Solid-State Fluorescence

Akansha Ekka <sup>1</sup>, Aditya Choudhury <sup>1</sup>, Madhumita Samanta <sup>1</sup>, Ayushi Deshmukh <sup>1</sup>, Nathan R. Halcovitch <sup>2</sup>, In-Hyeok Park <sup>3,\*</sup> and Raghavender Medishetty <sup>1,\*</sup>

<sup>1</sup> Department of Chemistry, Indian Institute of Technology Bhilai, Kutelabhata, Durg 491001, India

<sup>2</sup> Chemistry Department, Lancaster University, LA1 4YB, United Kingdom

<sup>3</sup> Graduate School of Analytical Science and Technology (GRAST), Chungnam National University, Daejeon 34134, Republic of Korea

\* Correspondence: ipark@cnu.ac.kr (I.-H.P.); raghavender@iitbhilai.ac.in (R.M.)

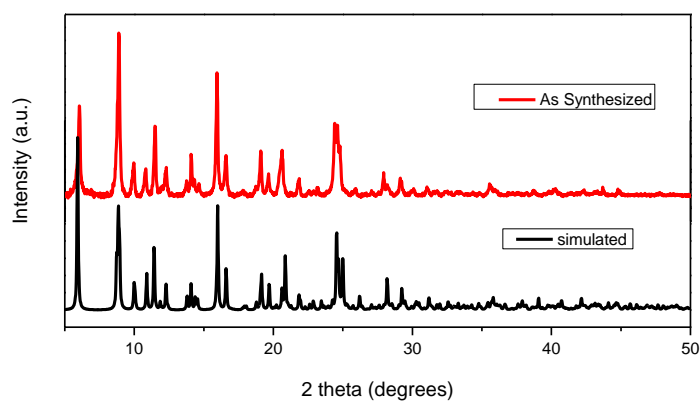

Figure S1. Comparison of SCXRD simulated & experimental PXRD pattern of 1.

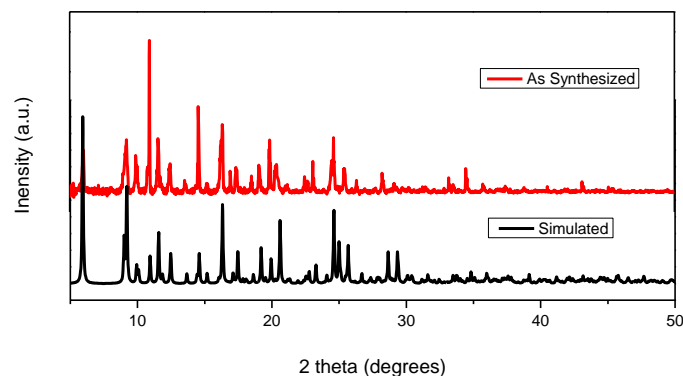

Figure S2. Comparison of SCXRD simulated & experimental PXRD pattern of 2.

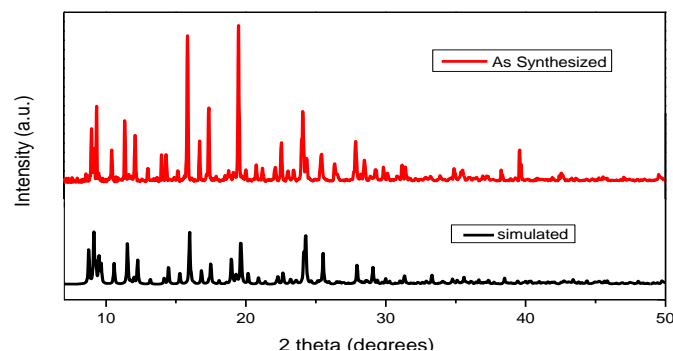

Figure S3. Comparison of SCXRD simulated & experimental PXRD pattern of 3.

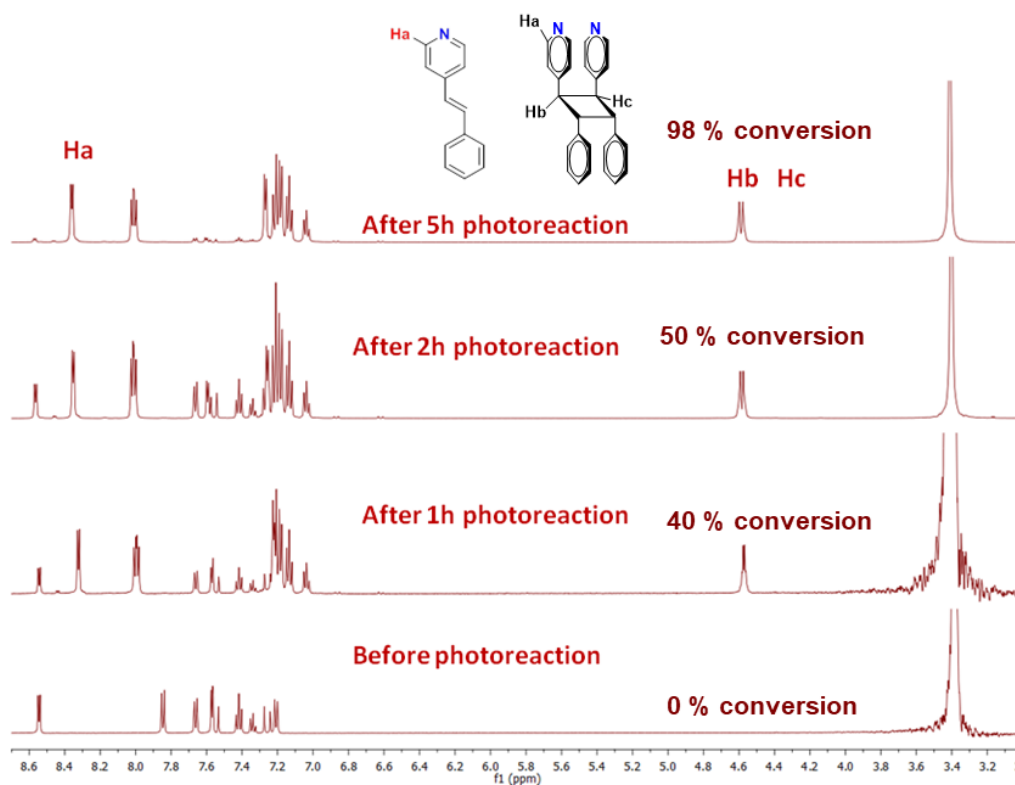

Figure S4. Time-dependent  $^1\text{H}$  NMR plot of **2**.

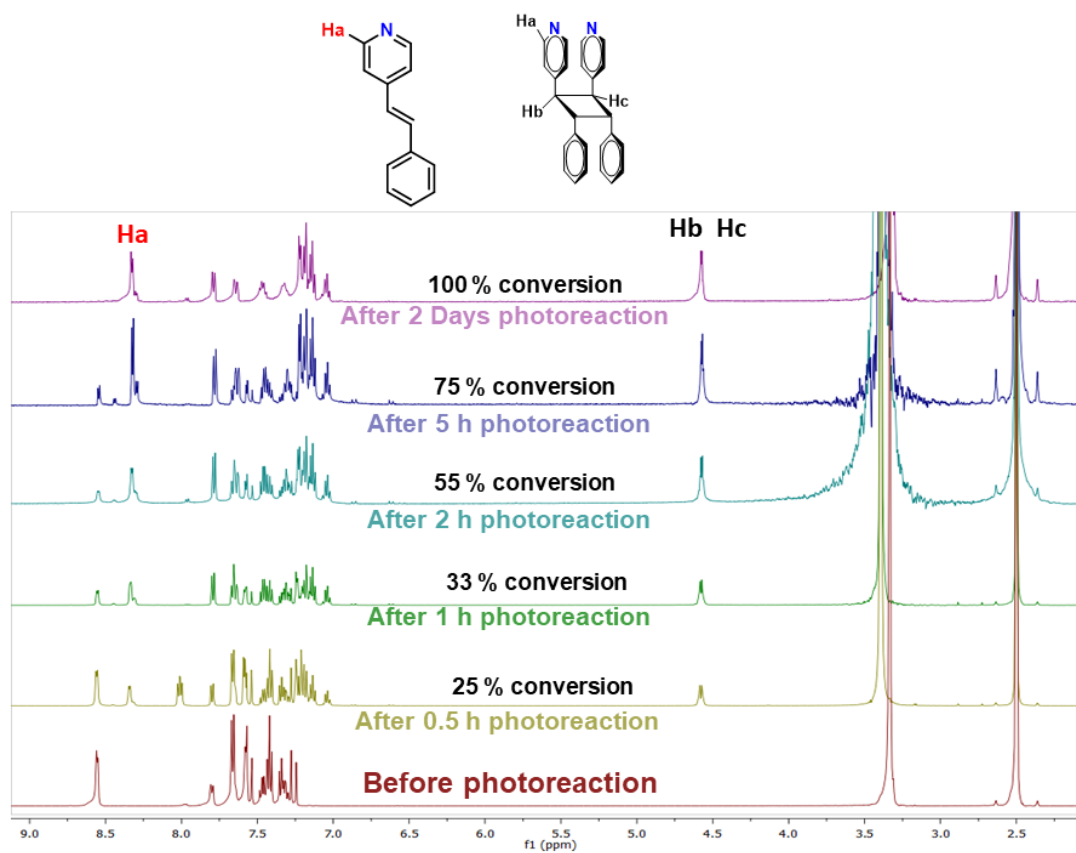

Figure S5. Time-dependent  $^1\text{H}$  NMR plot of **3**.

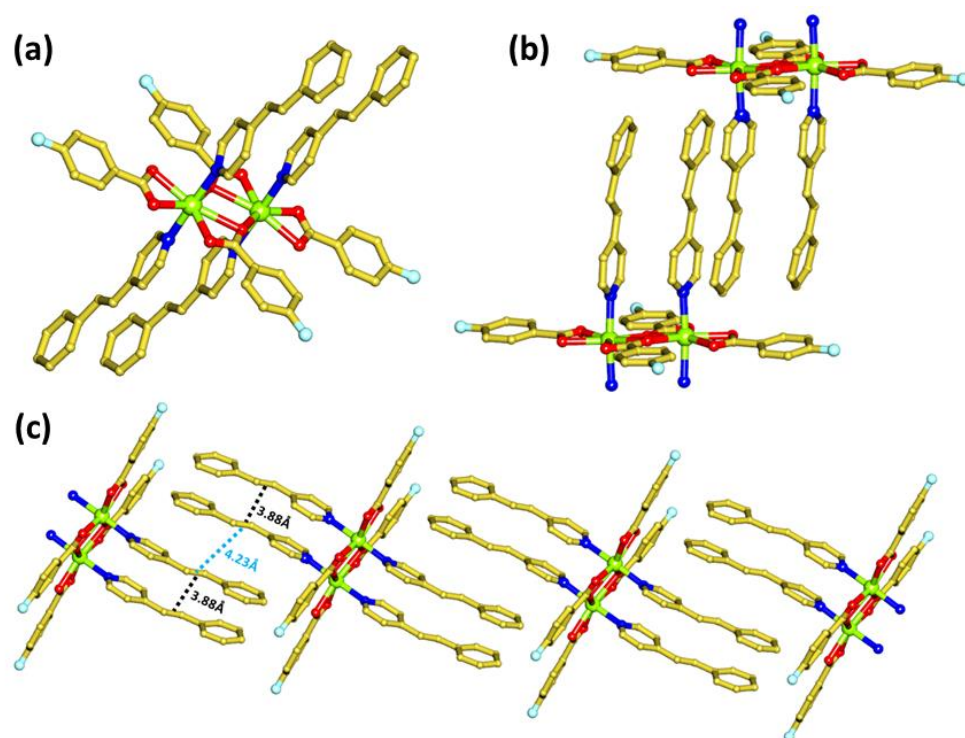

**Figure S6.** Crystal structure of  $[\text{Cd}_2(4\text{FBA})_4(4\text{spy})_4]$  (2). (a) Metal complex of 2. (b) Alignment of the photoreactive linker in 2. (c) Extended head-to-head and head-to-tail alignment. All H-atoms are omitted for clarity. Colour codes: C = golden; N = dark blue; O = red; F= cyan; Cd = green.

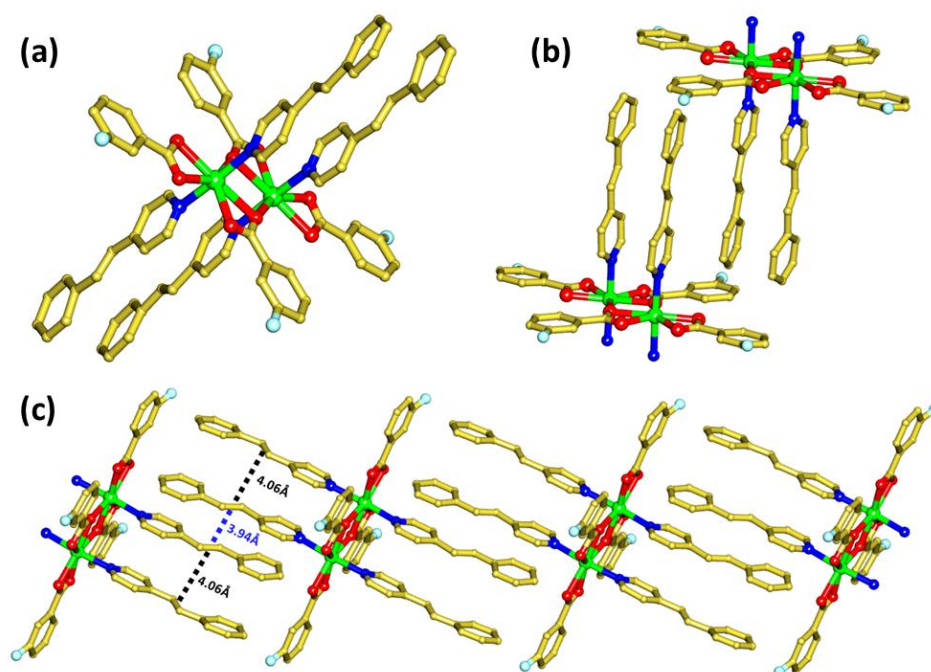

**Figure S7.** Crystal structure of  $[\text{Cd}_2(3\text{FBA})_4(4\text{spy})_4]$  (3). (a) Metal complex of 3. (b) Alignment of the photoreactive linker in 3. (c) Extended head-to-head and head-to-tail alignment. All H-atoms are omitted for clarity. Colour codes: C = golden; N = dark blue; O = red; F= cyan; Cd = green.

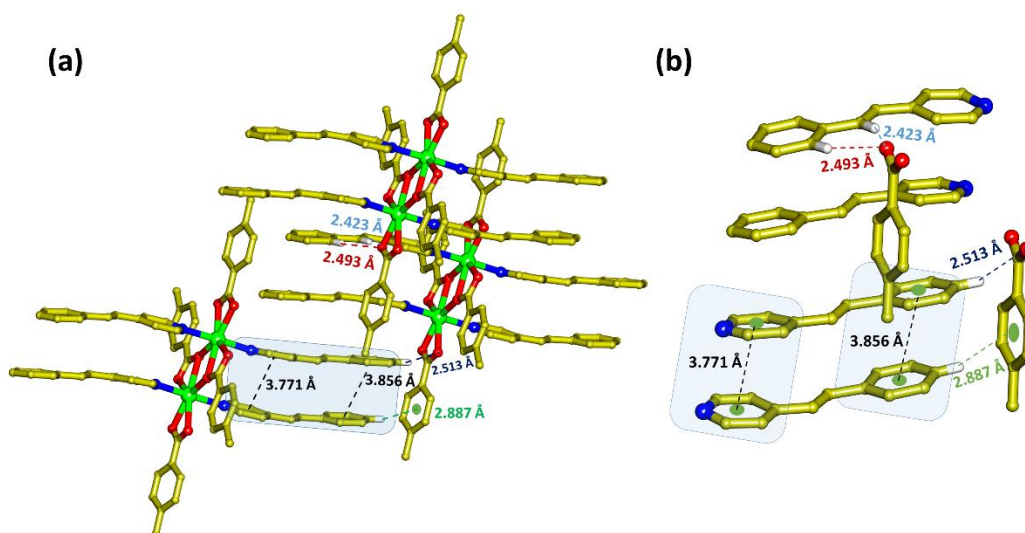

**Figure S8.** Depiction of non-covalent interactions in  $[\text{Cd}_2(\text{p-tol})_4(4\text{spy})_4]$  (1). (a)  $\pi$ - $\pi$  interactions are shown as blue shade. C-H... $\pi$  interactions are shown as green dashed line. C-H...O interactions are shown as blue (dark and light) and red dashed line. (b) Enlarged view of photoreactive linker depicting non-covalent interactions. All H-atoms are omitted for clarity. Colour codes: C = golden; N = dark blue; O = red; Cd = green.

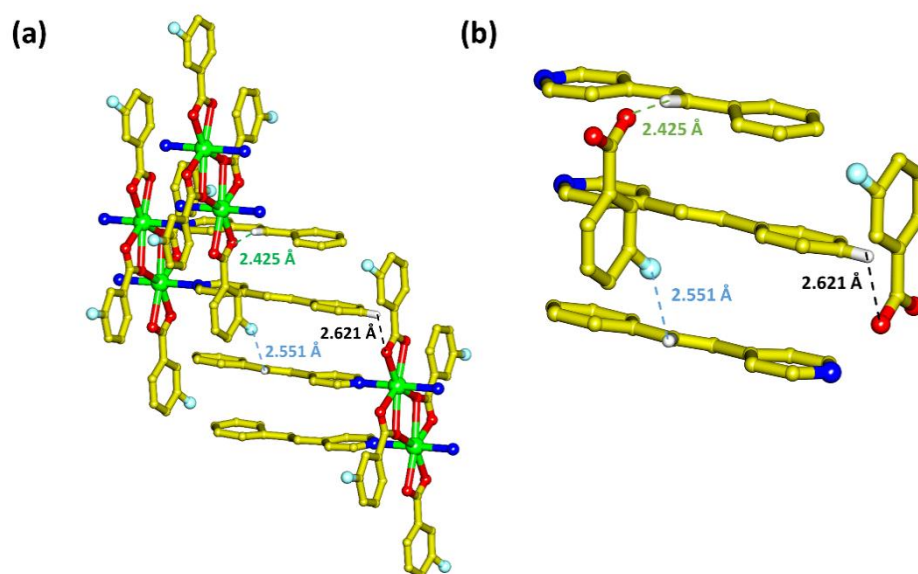

**Figure S9.** Depiction of non-covalent interactions in  $[\text{Cd}_2(3\text{FBA})_4(4\text{spy})_4]$  (3). (a) C-H...F interactions are shown as blue dashed line. C-H...O interactions are shown as black and green dashed line. (b) Enlarged view of photoreactive linker depicting non-covalent interactions. All H-atoms are omitted for clarity. Colour codes: C = golden; N = dark blue; O = red; F = cyan; Cd = green.

**Table S1.** Bond lengths along the coordination geometry of Cd(II) ion.

**Compound-1:**

| <b>Bond between</b> | <b>Length (Å)</b> |
|---------------------|-------------------|
| Cd1-O1              | 2.4234(17)        |
| Cd1-O2              | 2.3566(16)        |
| Cd1-O3              | 2.3358(17)        |
| Cd1-O4              | 2.5125(17)        |
| Cd1-O4              | 2.3614(16)        |
| Cd1-N1              | 2.325(2)          |
| Cd1-N2              | 2.316(2)          |

**Compound-2:**

| <b>Bond between</b> | <b>Length (Å)</b> |
|---------------------|-------------------|
| Cd1-O1              | 2.3181(15)        |
| Cd1-O2              | 2.5894(15)        |
| Cd1-O2              | 2.3317(14)        |
| Cd1-O3              | 2.3832(14)        |
| Cd1-O4              | 2.4033(15)        |
| Cd1-N1              | 2.3072(18)        |
| Cd1-N2              | 2.296(6)          |

**Compound-3:**

| <b>Bond between</b> | <b>Length (Å)</b> |
|---------------------|-------------------|
| Cd1-O1              | 2.352(3)          |
| Cd1-O2              | 2.378(2)          |
| Cd1-O2              | 2.529(3)          |
| Cd1-O3              | 2.404(3)          |
| Cd1-O4              | 2.379(3)          |
| Cd1-N1              | 2.320(3)          |
| Cd1-N2              | 2.327(3)          |

**Compound-4r:**

| <b>Bond between</b> | <b>Length (Å)</b> |
|---------------------|-------------------|
| Cd1-O1              | 2.426(7)          |
| Cd1-O2              | 2.389(9)          |
| Cd1-O3              | 2.373(9)          |
| Cd1-O4              | 2.469(12)         |
| Cd1-O5              | 2.352(7)          |
| Cd1-N1              | 2.329(8)          |
| Cd1-N2              | 2.355(8)          |
| Cd2-O6              | 2.311(10)         |
| Cd2-O7              | 2.631(14)         |
| Cd2-O8              | 2.407(8)          |
| Cd2-O9              | 2.398(10)         |
| Cd2-O10             | 2.340(7)          |
| Cd2-N3              | 2.324(9)          |
| Cd2-N4              | 2.326(8)          |
